# Supplementary material for: Preparation of functionalized zirconium phosphate and its effect on the flame retardancy of silicone rubber
Source: Royal Society of Chemistry journal article supplement (doi:10.1039/c7ra11459a), 2018-01-01
Supplement: c7ra11459a1.pdf [file c7ra11459a1.pdf]

## Supporting Information

### **Preparation of functionalized zirconium phosphate and its effect on the flame retardancy of silicone rubber**

*Yajun Zhang, Xingrong Zeng\*, Xuejun Lai\*, Hongqiang Li*

College of Materials Science and Engineering, South China University of Technology,

Guangzhou 510640, People's Republic of China

#### **Corresponding Author**

\*Xingrong Zeng: E-mail: [psxrzeng@gmail.com](mailto:psxrzeng@gmail.com); Tel: +86-20-8711-4248.

\*Xuejun Lai: E-mail: [msxjlai@scut.edu.cn](mailto:msxjlai@scut.edu.cn); Tel: +86-20-2223-6629.

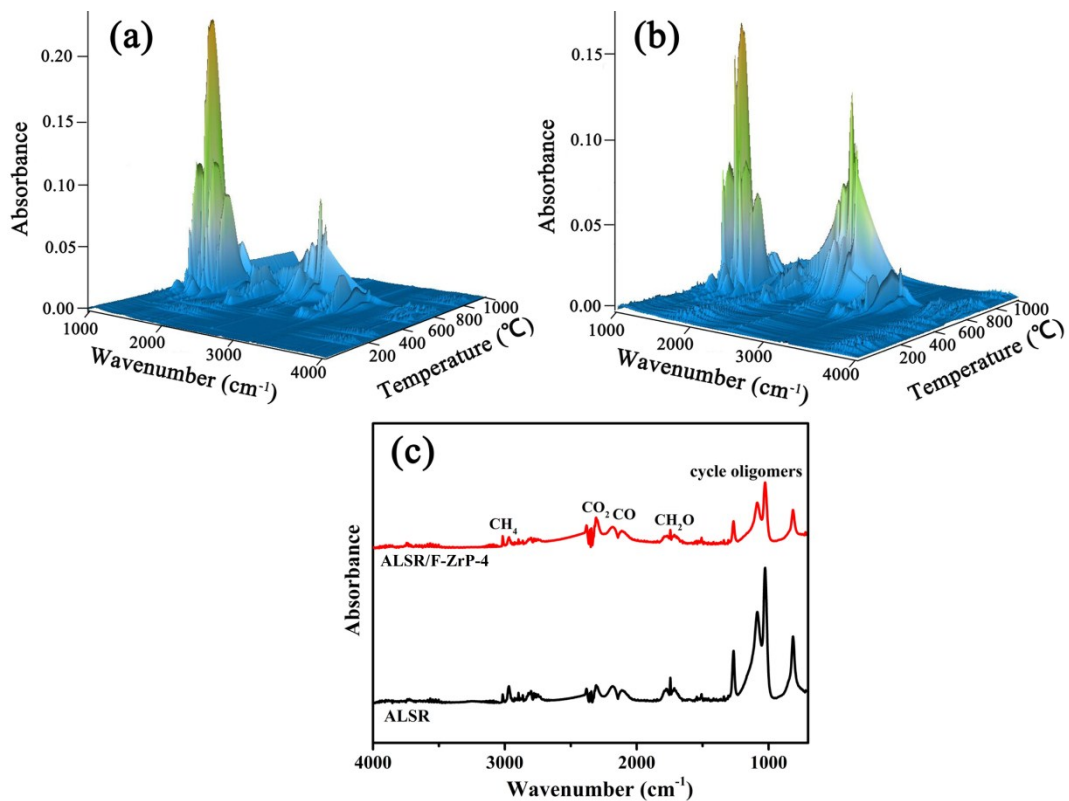

**Fig. S1** The 3D TG-IR spectra of gas phase in the thermal degradation of ALSR (a) and ALSR/F-ZrP (b), and (c) FTIR spectra of pyrolysis products of ALSR and ALSR/F-ZrP-4 at the maximum volatile release temperature under air atmosphere.

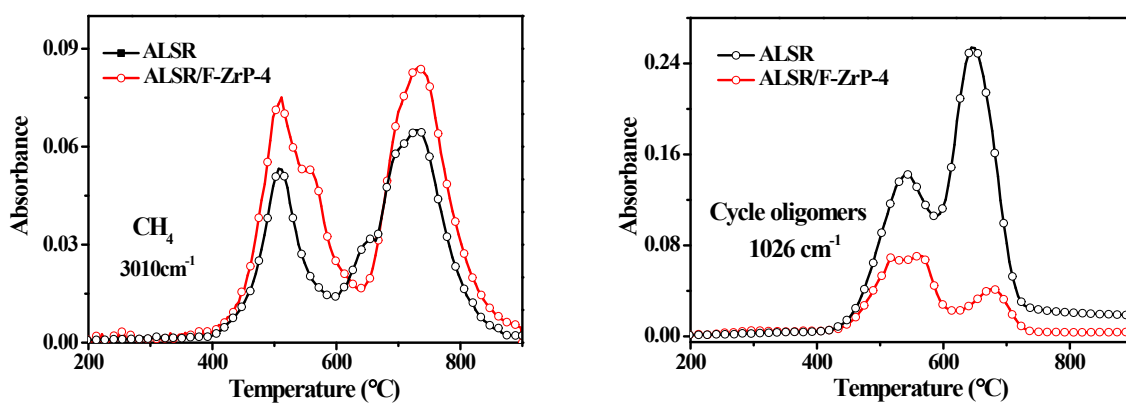

**Fig.S2** FTIR absorbance vs. temperature curves of pyrolysis products of ALSR and ALSR/F-ZrP-4 in the nitrogen.

**Table S1** The standard of the classifications for silicone rubber in the vertical burning

| Criteria                                                                            | test       |             |                                 |                          |
|-------------------------------------------------------------------------------------|------------|-------------|---------------------------------|--------------------------|
|                                                                                     | V-0        | V-1         | No rating<br>Self-extinguishing | No<br>self-extinguishing |
| Afterflame time for each individual specimen $t_1$ or $t_2$                         | $\leq 10s$ | $\leq 30s$  | $> 30s$                         | $> 30s$                  |
| Total afterflame time for any condition set ( $t_1$ plus $t_2$ for the 5 specimens) | $\leq 50s$ | $\leq 250s$ | Or $> 250s$                     | Or $> 250s$              |
| Afterflame plus afterglow time for after the second flame application ( $t_2+t_3$ ) | $\leq 30s$ | $\leq 60s$  | Or $> 60s$                      | Or $> 60s$               |
| Afterflame or afterglow of any specimen up to the holding clamp                     | No         | No          | No                              | Yes                      |
| Cotton indicator ignited by flaming particles or drops                              | No         | No          | No                              | No                       |

**Table S2** The mechanical properties of ALSR composites

| Sample              | Tensile strength (MPa) | Elongation at break (%) | Tear Strength (kN/m) |
|---------------------|------------------------|-------------------------|----------------------|
| ALSR                | 7.62±0.4               | 572±44                  | 20.6±2.1             |
| ALSR/ $\alpha$ -ZrP | 7.44±0.3               | 431±38                  | 19.9±1.8             |
| ALSR/PMVP           | 7.98±0.3               | 543±49                  | 23.9±2.2             |
| ALSR/F-ZrP-1        | 8.09±0.2               | 495±20                  | 24.6±1.8             |
| ALSR/F-ZrP-2        | 8.14±0.5               | 491±32                  | 23.8±2.3             |
| ALSR/F-ZrP-3        | 8.26±0.4               | 552±60                  | 24.4±1.6             |
| ALSR/F-ZrP-4        | 8.35±0.5               | 531±57                  | 26.0±2.7             |
